# Supplementary material
Source: ML conference proceedings conference paper supplement (https://openaccess.thecvf.com/content/ICCV2021/html/Rumberger_How_Shift_Equivariance_ICCV_2021_paper.html)
Supplement: Supplementary file 1 [file Rumberger_How_Shift_Equivariance_ICCV_2021_supplemental.pdf]

# Supplementary Material

## How Shift Equivariance Impacts Metric Learning for Instance Segmentation

Josef Lorenz Rumberger<sup>\*1,2</sup>, Xiaoyan Yu<sup>\*1,3</sup>, Peter Hirsch<sup>\*1,3</sup>, Melanie Dohmen<sup>\*1,2</sup>,  
Vanessa Emanuela Guarino<sup>\*1,3</sup>, Ashkan Mokarian<sup>1</sup>, Lisa Mais<sup>1</sup>, Jan Funke<sup>4</sup>, Dagmar Kainmueller<sup>1</sup>

<sup>1</sup> Max-Delbrueck-Center for Molecular Medicine in the Helmholtz Association (MDC),  
Berlin, Germany, {firstnames.lastname}@mdc-berlin.de

<sup>2</sup> Charité University Medicine, Berlin, Germany

<sup>3</sup> Humboldt-Universität zu Berlin, Faculty of Mathematics and Natural Sciences, Berlin, Germany

<sup>4</sup> HHMI Janelia Research Campus, Ashburn, VA, USA

### 1. Examples for equality of U-Net functions $u$

**Example 1:** For a U-Net with identity convolutions, weights 0 for skip connections, and fixed upsampling, functions  $u$  that merely pass the value of a bottleneck pixel through to the output (cf. Fig. 1 in the main paper) are absolute-equal, yet relative-distinct.

**Example 2a:** For a U-Net with output tile size  $w = 1$  (i.e. a single output pixel per tile), employed in a sliding-window fashion (cf. Sec. 2.1 in the main paper), all functions  $u$  are relative-equal, yet absolute-distinct.

**Example 2b:** For a U-Net with pooling factor  $f = 1$  (i.e. no pooling and thus full shift equivariance), all functions  $u$  are relative-equal, yet absolute-distinct.

### 2. Proof of Lemma 1, Part II

An operator  $F$  operating on images  $I$  is *shift equivariant to image shifts  $t$*  iff shifting any input image  $I$  by  $t$  causes an equal or proportional shift  $t'$  in the function's output, i.e.  $\forall I \forall x : T_{t'}(F(I))(x) = F(T_t(I))(x)$ . In case  $t = t'$ , we call  $F$  shift equivariant to input shifts  $t$ . In case  $t \neq t'$ , we call  $F$  shift equivariant to input shifts  $t$  at output shifts  $t'$ . In the following, we prove that any U-Net with  $l$  pooling layers and pooling factor  $f$  is shift equivariant to image shifts  $f^l t$ ,  $t \in \mathbf{Z}$ . Without loss of generality, we consider one-dimensional, one-channel input images, and one-channel feature maps throughout. A U-Net is composed of an encoder path and a decoder path:

**Encoder Path.** An encoder block is composed of a number of conv+ReLU layers. We refer to the function implemented by the  $i$ -th encoder block as  $E_i$ . The output of  $E_i$  is passed through a max pooling layer, referred to as  $MP_i$ . We refer to the composition of  $E_i$  and  $MP_i$  as  $EMP_i$ . The convolution operator  $F_{conv}$  (stride=1) is commonly defined as  $F_{conv}(g)(x) = (g \star h)(x) = \sum_{m \in \mathbf{Z}} g(m)h(m-x)$  (see e.g. [1]), and well-known and easily shown to be shift equivariant to any shifts  $t$ :

$$\begin{aligned}
 F_{conv}(T_t(g))(x) &= \sum_{m \in \mathbf{Z}} g(m-t)h(m-x) \\
 &= \sum_{m' \in \mathbf{Z}} g(m')h(m'+t-x) \\
 &= \sum_{m' \in \mathbf{Z}} g(m')h(m'-(x-t)) \\
 &= T_t(F_{conv}(g))(x)
 \end{aligned} \tag{1}$$

---

\*equal contribution

The same holds for the ReLU operator:  $ReLU(T_t(g))(x) = \max(0, T_t(g)(x)) = \max(0, g(x-t)) = T_t(ReLU(g))(x)$ . Compositions of shift equivariant operators are also shift equivariant, hence  $E_i$  is shift equivariant to any input shifts  $t$ . To analyze  $MP_i$ , we break it down into the max pooling operator  $\psi_f(g)(x) := \max\{g(x+i) \mid i \in \{0, \dots, f-1\}\}$  with kernel size  $f$ , and the sub-sampling operator  $s_f(g)(x) := g(fx)$  at stride  $f$ . Analogous to ReLU,  $\psi_f$  is shift equivariant to any shift  $t$ ,

$$\begin{aligned} \psi_f(T_t(g))(x) &= \max\{T_t(g)(x+i) \mid i \in \{0, \dots, f-1\}\} \\ &= \max\{g(x+i-t) \mid i \in \{0, \dots, f-1\}\} \\ &= T_t(\psi_f(g))(x), \end{aligned} \quad (2)$$

while  $T_t(s_f(g))(x) = s_f(T_{ft}(g))(x)$ , i.e.  $s_f$  is shift equivariant to input shifts  $ft$  at proportional shifts  $t$  of the output. With this we get

$$\begin{aligned} EMP_i(T_{ft}(g))(x) &= s_f(\psi_f(E_i(T_{ft}(g))))(x) \\ &= s_f(T_{ft}(\psi_f(E_i(g))))(x) \\ &= T_t(s_f(\psi_f(E_i(g))))(x) \\ &= T_t(EMP_i(g))(x), \end{aligned} \quad (3)$$

i.e., an encoder block with max pooling with downsampling factor  $f$  is shift equivariant to input shifts  $ft$  at proportional output shifts  $t$ . Overall, a general encoder path  $E$  employs  $l$  downsampling operations with factors  $f_1, \dots, f_l$ . Shift equivariance proportionality factors multiply when composing operators, hence the encoder path is shift equivariant to input shifts  $t \prod_1^l f_l$  at output shifts  $t$ . In the family of U-Nets we consider,  $f_i = f_j$  for all  $i, j$ , yielding shift equivariance to input shifts  $tf^l$  at output shifts  $t$ :  $E(T_{tf^l}(I))(x) = T_t(E(I))(x)$ .

**Decoder Path.** The decoder path is composed of decoder blocks  $D_i$ , whose output is passed through respective upsampling layers, referred to as  $UP_i$ . A decoder block has the same form as an encoder block, i.e. it consists of a number of conv+ReLU layers, and is thus shift equivariant. We refer to the composition of  $D_i$  and  $UP_i$  as  $DUP_i$ . Upsampling is either *learnt*, i.e. performed via up-convolution with trainable kernel function  $p(x)$ , with kernel size = stride =  $f$  (also called upsampling factor), or performed via nearest neighbor interpolation. We treat both in one go, as the latter is a special case of the former with fixed kernel function  $p(x) \equiv 1$ . We can express the up-convolution operator  $UP_i$  with upsampling factor  $f$  as  $UP_i(g)(x) = (g * p)(x) = \sum_{m \in \mathbf{Z}} g(m)p(x - fm)$ . Concerning its shift equivariance,

$$\begin{aligned} UP_i(T_t(g))(x) &= \sum_{m \in \mathbf{Z}} g(m-t)p(x - fm) \\ &= \sum_{m' \in \mathbf{Z}} g(m')p(x - f(m'+t)) \\ &= \sum_{m' \in \mathbf{Z}} g(m')p((x - ft) - dm') \\ &= T_{ft}(UP_i(g))(x), \end{aligned} \quad (4)$$

i.e., upsampling with factor  $f$  is shift equivariant to input shifts  $t$  at output shifts  $ft$ . Thus a decoder block with subsequent upsampling layer,  $DUP_i$ , is also shift equivariant to input shifts  $t$  at output shifts  $ft$ :  $DUP_i(T_t(g))(x) = T_{ft}(DUP_i(g))(x)$ . Concerning the input to  $DUP_i$ , at the bottleneck level  $i = l$ , this is the output of  $EMP_l$ . Concerning shift equivariance of their composition  $U_l := DUP_l \circ EMP_l$ , assuming equal down- and upsampling factors  $f$ , we get

$$\begin{aligned} U_l(T_{ft}(g))(x) &= DUP_l(EMP_l(T_{ft}(g)))(x) \\ &= DUP_l(T_t(EMP_l(g)))(x) \\ &= T_{ft}(DUP_l(EMP_l(g)))(x) \\ &= T_{ft}(U_l(g))(x), \end{aligned} \quad (5)$$

i.e.,  $U_l$  is shift invariant to shifts  $ft$ . For  $i < l$ , the input to  $DUP_i$  is a multi-channel image formed by concatenating the output of  $DUP_{i+1}$  and the output of encoder block  $E_{i+1}$ . Referring to the composition of all U-Net blocks up to a block  $B$  as  $\tilde{B}$ , we can write the input to  $DUP_i$  as  $(T_{\Delta x_{i+1}}(\tilde{E}_{i+1}(I)), \tilde{DUP}_{i+1}(I))$ . Here,  $\Delta x_{i+1}$  is the shift required to centrally align  $\tilde{E}_{i+1}(I)$  and  $\tilde{DUP}_{i+1}(I)$ , as  $\tilde{DUP}_{i+1}(I)$  is of size smaller or equal than  $\tilde{E}_{i+1}(I)$ . All  $\Delta x_i$  are fixed for a given architecture, and hence image concatenation is shift equivariant:  $(T_{\Delta x_i}(T_t(g)), T_t(q))(x) = T_t((T_{\Delta x_i}(g), q))(x)$ . Consequently, just

like  $DUP_l$ , for  $i < l$ ,  $DUP_i$  is shift equivariant to input shifts  $t$  at output shifts  $ft$ . Furthermore, as proportional shift equivariance factors multiply when composing respective operators, analogous to  $U_l := DUP_l \circ EMP_l$ , we get that the composition of all blocks from  $EMP_i$  to  $DUP_i$ ,  $U_i := DUP_i \circ U_{i+1} \circ EMP_i$ , is shift equivariant to shifts  $f^{l-i+1}t$ . In particular,  $U_1$  is shift equivariant to shifts  $f^l t$ .

To yield the full U-Net function  $U$ , the outputs of  $U_1$  and  $E_1$  are concatenated into a multi-channel image, which is passed through a final shift invariant decoder block  $D_0$ ,  $U := D_0((T_{\Delta x_1} E_1(I), U_1(I)))$ . Thus  $U$  is equally shift equivariant as  $U_1$ , i.e., the U-Net is shift equivariant to shifts  $f^l t$ .  $\square$

### 3. Quantitative Evaluation on Benchmark Data

**BBBC006:** The dataset is split into 691 training and 77 test images. Images contain on average 97 instances. We trained a U-Net with  $f=2, l=4$ , 16-d embeddings and discriminative loss with training tile size 148 and used two-fold cross-validation on the test data to tune hyperparameters.

**DSB2018:** The dataset is split into 380 training, 67 validation and 50 test images. Images contain on average 49 instances. We trained a U-Net with  $f=2, l=4$ , 16-d embeddings and discriminative loss with training tile size 68. Aside from the loss the same setup as in [3] is used.

**nuclei3d:** The dataset is split into 18 training, 3 validation and 7 test volumes. Volumes contain on average 537 instances. We trained a U-Net with  $f=2, l=3$ , 16-d embeddings and discriminative loss with training tile size 148. Aside from the loss the same setup as in [2] is used.

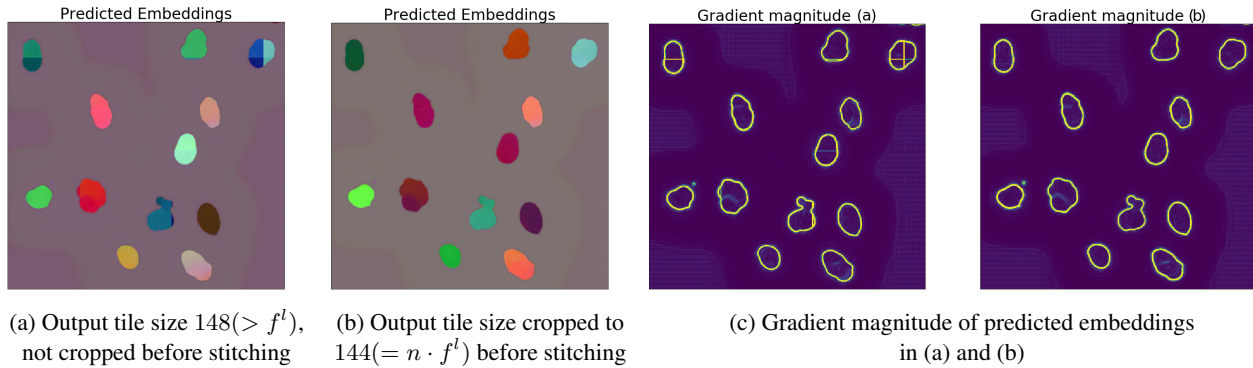

Figure 1: Predicted embeddings of a U-Net (a) naively stitched without cropping and (b) cropped to  $n \cdot f^l$  before stitching. Inconsistencies at the stitching boundaries are clearly visible in the (c) gradient magnitudes of the embeddings.

### 4. Zero padding leads to location awareness

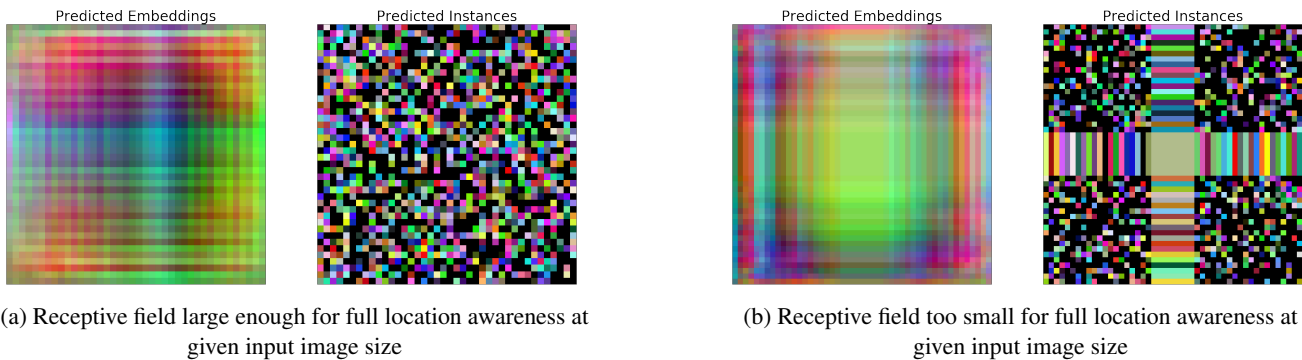

Figure 2: A U-Net with zero-padding yields location awareness also with nearest-neighbor upsampling, if (a) each output pixel has a unique receptive field that reaches the image boundary. Otherwise, for a constant input image, (b) some pixels will necessarily receive equal outputs. Showcase:  $l=2, f=2$ , input image  $I \equiv 1$ .

## 5. Practical Impact of Noise and Small Deformations

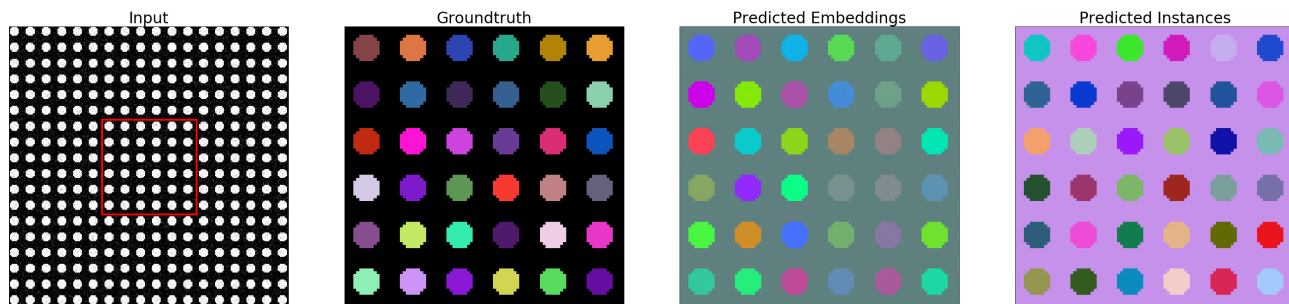

(a) Slight gaussian noise added to the input: Instances distinguished despite object spacing  $f^l$

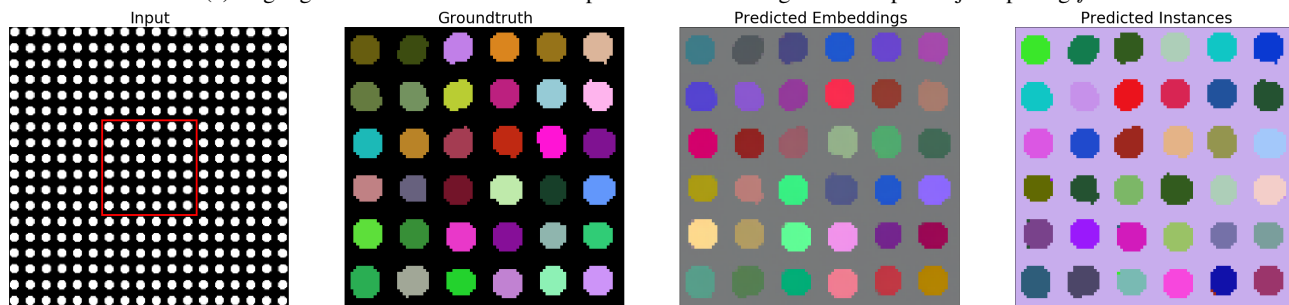

(b) Elastic deformations: Instances distinguished despite object spacing  $f^l$

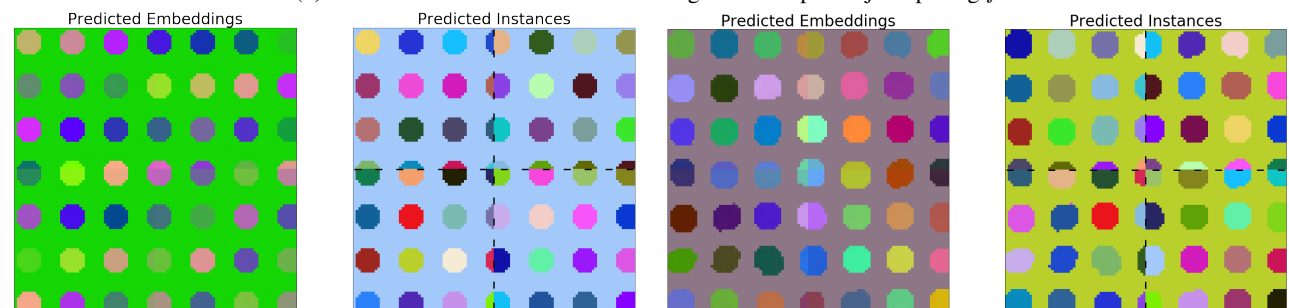

(c) Slight gaussian noise: No effect on stitching issues

(d) Elastic deformations on the input: No effect on stitching issues

Figure 3: (a) and (b): Slight image augmentations enable a U-Net to distinguish objects that are otherwise indistinguishable due to object spacing  $f^l$ . Showcase:  $l = 4$ ,  $f = 2$ , learnt upsampling. (a) Slight Gaussian noise, and (b) elastic deformations, best viewed on screen with zoom. (c) and (d): However, image augmentations do not affect the issue of inconsistencies in a tile-and-stitch approach if output tiles are not cropped to edge length  $n \cdot f^l$  before stitching. Showcase:  $l = 4$ ,  $f = 2$ , inference output tile size  $52 \neq n \cdot 2^4$ .

## References

- [1] Taco Cohen and Max Welling. Group equivariant convolutional networks. In *International Conference on Machine Learning*, pages 2990–2999, 2016. 1
- [2] Peter Hirsch and Dagmar Kainmueller. An auxiliary task for learning nuclei segmentation in 3d microscopy images. In *Medical Imaging with Deep Learning*, pages 304–321. PMLR, 2020. 3
- [3] Peter Hirsch, Lisa Mais, and Dagmar Kainmueller. PatchPerPix for instance segmentation. *CoRR*, 2020. 3
